# Supplementary material for: Spatial biology using single-cell mass spectrometry imaging and integrated microscopy
Source: Research Square preprint supplement (doi:10.21203/rs.3.rs-6751055/v1), 2025-06-25
Supplement: Supplementary file 1 [file 665ff6bcab2f96f953e54096.docx]

Supporting Information for

Spatial biology using single-cell mass spectrometry imaging and integrated microscopy

Alexander Potthoff 1, Jan Schwenzfeier 1, Marcel Niehaus 2, Sebastian Bessler 1, Emily Hoffmann 3, Oliver Soehnlein 4, Jens Höhndorf 2, Klaus Dreisewerd 1, Jens Soltwisch 1

1Institute of Hygiene, University of Münster, Münster, Germany

2Bruker Daltonics GmbH & Co. KG, Bremen, Germany

3Clinic of Radiology, University of Münster, Münster Germany

4Institute of Experimental Pathology, University of Münster, Germany

*correspondence addressed to: jenssol@uni-muenster.de

Contents:

Note S1: Determining the fidelity of co-registration between external FM and MSI

Note S2: Annotation of lipids in murine cerebellum and comparison to the literature

Table S1: List of lipid annotations from murine cerebellum samples (separate file)

Table S2: List of lipid annotations in 4T1-tumor samples (separate file)

Table S3: Table of resources

Data S1: Python code for instrument control (separate file)

## **Note S1: Determining the fidelity of co-registration between external FM and MSI**

## To quantify the accuracy of co-registration between the external FM image and the t-MALDI-2-MSI results, we selected the center of eleven Purkinje cell bodies in the respective images to serve as retrievable pairs of markers (**Extended Data Fig. 1B-C**). The manual placing of each marker at the correct center position of each cell of each individual marker includes individual errors. This results an imprecision in the range of 2-4 µm for each pair. The average across all pairs, however, statistically eliminates the manual placement error and reveals a high fidelity of co-registration with a deviation of less than 1 µm for the x- and y-axis, respectively.

**Note S2: Annotation of lipids in murine cerebellum and comparison to the literature**

Certain fixation and staining steps prior to MALDI-MSI analysis have been described to reduce coverage of the investigated lipidome 1. These may include chemical crosslinking of amine containing analytes using paraformaldehyde or the depletion of polar lipids during incubation with aqueous staining solutions. To explore the depth of information for lipid analysis available from pre-stained t-MALDI-2-MSI at a pixel size of 1x1 µm², mass spectral information was matched against a full lipidomics profile for murine cerebellum available from the literature 2. Tentative assignment was based on accurate mass with a tolerance of 3 ppm. This assignment includes the lipid class, the number of carbons and number of double bonds in the fatty acyl chains as well as possible oxidations. It does not differentiate lipid isomers of the same or different lipid classes. On this level of specificity, the conflation of isomeric structures deductible from the literature results in 255 unique *m/z*-values.

Analysis reveals that 82% of the reported molecular lipid content of cerebellum are detected in the t-MALDI-2 measurement. This amounts to 66 *m/z*-values that are detected in t-MALDI-2-MSI producing meaningful intensity distributions in positive and/or negative ion mode measurements (**Table S1**). In particular, this includes lipid classes, such as phosphatidylethanolamine (PE) and phosphatidylserine (PS) that may be affected by prior fixation 1. Comparison of the detected signal intensities with the molar content of the different lipoforms of each of the detected lipid classes shows a good agreement with the literature (**Extended Data Fig. 2A-F**).

More pronounced deviations from the literature, such as for PC(32:2) that shows a much lower content in MSI may be explained by differences in the employed mouse model; here, the literature is also at variance 3. Other deviating results such as PE(40:7) and the hexosylceramide HexCer(42:2;O2) may be explained by the selection of the investigated area. Here, specific lipids could be over-or under represented based on the specific tissue type whereas bulk analysis averages over a much larger volume. Some lipid species and lipid classes that occur at very low concentration in brain, such as cardiolipins (CL) or ceramides (Cer) are not detected in the presented t-MALDI-2-MSI data.

**Table S1: see separate file**

**Table S2: see separate file**

**Table S3: Table of resources**

| **REAGENT or RESOURCE** | **SOURCE** | **IDENTIFIER** |
| --- | --- | --- |
| Antibodies | | |
| Anti-Calbindin antibody | Abcam | Cat# ab229915; RRID:AB_3086776 |
| Goat Anti-Rabbit IgG H&L (Alexa Fluor® 594) | Abcam | Cat# ab150080; RRID:AB_2650602 |
| Alexa Fluor® 594 Anti-Ly6g antibody [EPR22909-135] | Abcam | Cat# ab307167 |
| DcTRAIL-R1 (TNFRH1) Antibody, anti-mouse (APC-Vio® 770) | Miltenyi Biotec | Cat# 130-110-873; RRID:AB_2651535 |
| CD45 Antibody, anti-mouse, APC, REAfinity | Miltenyi Biotec | Cat# 130-110-798; RRID:AB_2658220 |
| Chemicals, peptides, and recombinant proteins | | |
| CellMask™ Green Actin Tracking Stain | Thermo Fisher | Cat# A57243 |
| Hoechst 33342 | Sigma-Aldrich | Cat# 14533 |
| pHrodo™ Red E. coli BioParticles™ Conjugate for Phagocytosis | Thermo Fisher | Cat# P35361 |
| Ammonium acetate | Sigma-Aldrich | Cat# A1542 |
| Gibco™ PBS, pH 7.4 | Thermo Fisher | Cat# 12579099 |
| Albumin bovine Fraction V, pH 7.0 (BSA) | Serva | Cat# 11930.03 |
| RPMI 1640 Medium | Lonza | Cat# BE15-398D |
| L-glutamine | Lonza | Cat# BE17-605F |
| Fetal bovine serum | Sigma-Aldrich | Cat# S0615 |
| Sodium pyruvate | Sigma-Aldrich | Cat# S8636 |
| phorbol 12-myristate 13-acetate (PMA) | Sigma-Aldrich | Cat# P1585 |
| Formaldehyde 30 %, low-methanol | Roth | Cat# 4235.1 |
| Mayer′s hemalum solution | Sigma-Aldrich | Cat# 109249 |
| Eosin Y-solution 0.5% aqueous | Sigma-Aldrich | Cat# 109844 |
| α-Cyano-4-hydroxycinnamic acid (CHCA) | Sigma-Aldrich | Cat# 70990 |
| 2-(4-Hydroxyphenylazo)benzoic acid (HABA) | Sigma-Aldrich | Cat# 54793 |
| 2,5-Dihydroxybenzoic acid (DHB) | Sigma-Aldrich | Cat# 85707 |
| Epredia™ M-1 Embedding Matrix | Thermo Fisher | Cat# 10056778 |
| DMEM, high glucose, GlutaMAX™ | Thermo Fisher | Cat# 61965026 |
| Deposited data | | |
| MALDI-MSI raw and process data | This paper | will be available at the time of publication |
| Fluorescence and brightfield microscopy data | This paper | will be available at the time of publication |
| Cell masks and mass spectra | This paper | will be available at the time of publication |
| Experimental models: Cell lines | | |
| Human: THP-1 cells | DSMZ | ACC-16 |
| Software and algorithms | | |
| Python version 3.8 | Python Software Foundation | https://www.python.org |
| ImageJ | Rasband 4 | https://imagej.net/ij/ |
| XC-SDK 2018 | Sony | https://www.image-sensing-solutions.eu/XCG-CG160.html |
| SCiLS Lab MVS, Version 2024b Pro | Bruker Daltonics | https://www.bruker.com/en/products-and-solutions/mass-spectrometry/ms-software/scils-lab.html |
| flexImaging 7.5 R&D Prototype | Bruker Daltonics |  |
| timsControl 6.0.0 alpha | Bruker Daltonics |  |
| OlyVIA 4.1 | Evident | https://www.olympus-lifescience.com/de/discovery/image-sharing-made-easy-meet-olyvia/ |
| FISCAS | Schwenzfeier et al. 5 | https://github.com/BioMedMS/fiscas |
| SimpleITK 2.3.1 | NumFOCUS 6,7 | https://simpleitk.org |
| DeepCell Mesmer 0.12.9 | Van Valen Lab 8 | https://www.deepcell.org/ |
| CellProfiler 4.2.1 | Cimini Lab 9 | https://cellprofiler.org/ |
| LipostarMSI 2.0.1 | Molecular Horizon 10 | https://www.molhorizon.it/software/lipostar/ |
| python-bioformats 4.1.0 | Lee Kamentsky | https://pypi.org/project/python-bioformats/ |
| opencv-Python-headless 4.6.0.66 | OpenCV Team | https://pypi.org/project/opencv-python-headless/ |
| imageio 2.22.4 | Almar Klein | https://pypi.org/project/imageio/ |
| python-javabridge 4.0.3 | Lee Kamentsky | https://pypi.org/project/python-javabridge/ |
| jupyterlab 4.2.3 | Project Jupyter | https://jupyter.org/ |
| matplotlib 3.6.3 | Matplotlib 11 | https://matplotlib.org/ |
| numba 0.56.4 | Numba | https://numba.pydata.org/ |
| numpy 1.23.4 | Numpy 12 | https://numpy.org/ |
| pandas 1.5.1 | Pandas 13 | https://pandas.pydata.org/ |
| scikit-image 0.19.3 | Scikit-Image 14 | https://scikit-image.org/ |
| scipy 1.9.3 | SciPy 15 | https://scipy.org/ |
| seaborn 0.13.2 | Seaborn 16 | https://seaborn.pydata.org/ |
| tqdm 4.64.1 | Tqdm 17 | https://pypi.org/project/tqdm/ |
| umap-learn 0.5.6 | UMAP 18 | https://pypi.org/project/umap-learn/ |
| Other | | |
| Millicell EZ Slide 8-well chamber slides | Sigma-Aldrich | Cat# PEZGS0816 |
| t-MALDI-2 mass spectrometer | Bruker | modified timsTOF fleX MALDI-2; this paper |
| Orbitrap mass spectrometer | Thermo Fisher | Q-Exactive Plus |
| Resublimation chamber | This paper | self-built |
| Cryostat | Leica Biosystems | Cat# CM 3050 S |
| Super PAP Pen Liquid Blocker | Science Services | Cat# N71310-N |
| MALDI IntelliSlides | Bruker Daltonics | Cat# 1868957 |
| SuperFrost slides | Thermo Fisher | Cat# 17284884 |
| Piezo sample stage | SmarAct | Custom Design |
| Objective M Plan Apo NUV HR 50X | Mitutoyo | Cat# 378-888-6 |
| Tube lens 100 mm | Thorlabs | Cat# TTL100-A |
| Digital Camera | Sony | XCG-CG160 |
| Dichroic Mirror HR355nm/45° Typ1  on FS-LO-V Ø25x6.35mm | Laseroptik | Cat# L-07246 |
| Green LED | Thorlabs | Cat# LED528EHP |
| Filter Cube | Thorlabs | Cat# DFM2/M |
| Filter Cube Insert | Thorlabs | Cat# DFM2T1 |
| DAPI LED | Thorlabs | Cat# M385FP1 |
| FITC LED | Thorlabs | Cat# M455F3 |
| mCherry LED | Thorlabs | Cat# MINTF4 |
| DAPI Filter Set | Thorlabs | Cat# MDF-BFP |
| FITC Filter Set | Thorlabs | Cat# MDF-FITC |
| mCherry Filter Set | Thorlabs | Cat# MDF-MCHC |
| 1951 USAF Resolution Test Targets, 3" x 1" | Thorlabs | Cat# R3L1S4P |
| VS200 Research Microscopy Slide Scanner | Olympus/Evident | VS200 |
| Digital Delay Pulse Generator | Quantum Composers | 9200 Sapphire Series |

**References Supporting Information**

1. Vos, D. R. N., Bowman, A. P., Heeren, R. M. A., Balluff, B. & Ellis, S. R. Class-specific depletion of lipid ion signals in tissues upon formalin fixation. *Int. J. Mass Spectrom.* **446**, 116212 (2019).

2. Fitzner, D. *et al.* Cell-Type- and Brain-Region-Resolved Mouse Brain Lipidome. *Cell Rep.* **32**, 108132 (2020).

3. Vandenbosch, M. *et al.* Toward Omics-Scale Quantitative Mass Spectrometry Imaging of Lipids in Brain Tissue Using a Multiclass Internal Standard Mixture. *Anal. Chem.* **95**, 18719–18730 (2023).

4. Schneider, C. A., Rasband, W. S. & Eliceiri, K. W. NIH Image to ImageJ: 25 years of image analysis. *Nat Methods* **9**, 671–675 (2012).

5. Schwenzfeier, J., Weischer, S., Bessler, S. & Soltwisch, J. Introducing FISCAS, a Tool for the Effective Generation of Single Cell MALDI-MSI Data. *J. Am. Soc. Mass Spectrom.* **35**, 2950–2959 (2024).

6. Yaniv, Z., Lowekamp, B. C., Johnson, H. J. & Beare, R. SimpleITK Image-Analysis Notebooks: a Collaborative Environment for Education and Reproducible Research. *J Digit Imaging* **31**, 290–303 (2018).

7. Lowekamp, B. C., Chen, D. T., Ibanez, L. & Blezek, D. The Design of SimpleITK. *Front. Neuroinform.* **7**, (2013).

8. Greenwald, N. F. *et al.* Whole-cell segmentation of tissue images with human-level performance using large-scale data annotation and deep learning. *Nat. Biotechnol.* **40**, 555–565 (2022).

9. Stirling, D. R. *et al.* CellProfiler 4: improvements in speed, utility and usability. *BMC Bioinf.* **22**, 433 (2021).

10. Tortorella, S. *et al.* LipostarMSI: Comprehensive, Vendor-Neutral Software for Visualization, Data Analysis, and Automated Molecular Identification in Mass Spectrometry Imaging. *J. Am. Soc. Mass Spectrom.* **31**, 155–163 (2020).

11. Hunter, J. D. Matplotlib: A 2D Graphics Environment. *Computing in Science & Engineering* **9**, 90–95 (2007).

12. Harris, C. R. *et al.* Array programming with NumPy. *Nature* **585**, 357–362 (2020).

13. McKinney, W. Data Structures for Statistical Computing in Python. *scipy* (2010) doi:10.25080/Majora-92bf1922-00a.

14. Walt, S. van der *et al.* scikit-image: image processing in Python. *PeerJ* **2**, e453 (2014).

15. Virtanen, P. *et al.* SciPy 1.0: fundamental algorithms for scientific computing in Python. *Nat Methods* **17**, 261–272 (2020).

16. Waskom, M. L. seaborn: statistical data visualization. *Journal of Open Source Software* **6**, 3021 (2021).

17. Costa-Luis, C. da *et al.* tqdm: A fast, Extensible Progress Bar for Python and CLI. Zenodo https://doi.org/10.5281/zenodo.14231923 (2024).

18. Healy, J. & McInnes, L. Uniform manifold approximation and projection. *Nat Rev Methods Primers* **4**, 1–15 (2024).
