# Supplementary material for: Spatial biology using single-cell mass spectrometry imaging and integrated microscopy
Source: Research Square preprint supplement (doi:10.21203/rs.3.rs-6751055/v1), 2025-06-25
Supplement: Supplementary file 2 [file 9293228939271cc9b0d4e769.xlsx]

## Sheet: positive Ion Mode
Table S1
Lipid annotations mouse cerebellum in positive ion mode
m/z-value		D	Name	Formula	Ion	ppm	Intensity	rel. intensity in lipid class
measured	matched							MSI	Fitzner et al. 28
369.352	369.352	0.0026	ST 27:1;O	C27H46O	[M+H-H2O]+	1.08298	41.8361	1	1
496.34	496.34	0.0008	LPC 16:0	C24H50NO7P	[M+H]+	0.40295	22.652	1	0.454222
577.519	577.519	0.0015	DG 34:1	C37H70O5	[M+H-H2O]+	0	21.7819	0.562115	0.169928
599.503	599.503	0.0024	DG 36:4	C39H68O5	[M+H-H2O]+	-1.50124	2.54979	0.0658011	0.0810883
605.55	605.55	0.0018	DG 36:1	C39H74O5	[M+H-H2O]+	-0.495417	8.52402	0.219975	0.140434
627.534	627.535	0.0017	DG 38:4	C41H72O5	[M+H-H2O]+	-1.11548	5.8942	0.152109	0.330165
702.543	702.543	0.0012	PE O-34:2	C39H76NO7P	[M+H]+	-0.28468	2.51587	0.0184583	0.0452321
703.575	703.575	0.0008	SM 34:1;O2	C39H79N2O6P	[M+H]+	0.284263	1.29085	0.0293992	0.0317246
718.538	718.538	0.0011	PE 34:1	C39H76NO8P	[M+H]+	-0.139171	3.52931	0.0258937	0.0215815
720.553	720.554	0.0018	PE 34:0	C39H78NO8P	[M+H]+	-0.416346	5.75314	0.0422094	0
728.558	728.559	0.0019	PE O-36:3	C41H80NO8P	[M+H]+	-0.549029	6.11257	0.0448465	0.073341
730.574	730.574	0.0025	PE O-36:2	C41H80NO7P	[M+H]+	-0.684393	5.91041	0.0433633	0.0737278
731.606	731.606	0.0011	SM 36:1;O2	C41H83N2O6P	[M+H]+	-0.136686	36.9537	0.841625	0.690976
732.554	732.554	0.0018	PC 32:1	C40H78NO8P	[M+H]+	0.273017	17.6268	0.0158299	0.00646672
734.569	734.569	0.0014	PC 32:0	C40H80NO8P	[M+H]+	0	182.308	0.163723	0.128604
744.553	744.554	0.0022	PE 36:2	C41H78NO8P	[M+H]+	-1.07447	5.31429	0.0389897	0
746.569	746.569	0.0024	PE 36:1	C41H80NO8P	[M+H]+	-0.535784	7.78319	0.0571034	0.0332483
756.552	756.554	0.0038	PC 34:3	C42H78NO8P	[M+H]+	-3.0401	18.3991	0.0165234	0.00148896
758.569	758.569	0.0024	PC 34:2	C42H80NO8P	[M+H]+	-0.527308	22.1041	0.0198507	0.0355679
759.637	759.637	0.0014	SM 38:1;O2	C43H87N2O6P	[M+H]+	-0.526567	2.94293	0.0670256	0.0594569
760.585	760.585	0.0016	PC 34:1	C42H82NO8P	[M+H]+	-0.131478	441.603	0.396583	0.287767
764.521	764.523	0.0025	PE 38:6	C43H74NO8P	[M+H]+	-1.30801	7.31727	0.0536851	0.0472608
766.536	766.538	0.0031	PE 38:5	C43H76NO8P	[M+H]+	-2.73959	7.15564	0.0524993	0.0231986
768.553	768.554	0.0028	PE 38:4	C43H78NO8P	[M+H]+	-1.04092	8.50679	0.0624123	0.0735202
774.601	774.601	0.0017	PE 38:1	C43H84NO8P	[M+H]+	-0.258198	22.9331	0.168255	0
776.558	776.559	0.0019	PE O-40:7	C45H78NO7P	[M+H]+	-1.15896	13.9771	0.102547	0.109635
780.552	780.554	0.0028	PC 36:5	C44H78NO8P	[M+H]+	-2.30606	4.30775	0.00386859	0.00355218
782.568	782.569	0.0034	PC 36:4	C44H80NO8P	[M+H]+	-1.78898	73.8415	0.0663137	0.0213703
786.6	786.601	0.0017	PC 36:2	C44H84NO8P	[M+H]+	-0.889905	34.2064	0.0307192	0.0296905
788.616	788.616	0.0019	PC 36:1	C44H86NO8P	[M+H]+	-0.507217	133.613	0.119992	0.101422
790.537	790.538	0.0031	PE 40:7	C45H76NO8P	[M+H]+	-2.02394	14.7066	0.107899	0.0186026
792.553	792.554	0.0021	PE 40:6	C45H78NO8P	[M+H]+	-1.0094	20.224	0.148379	0.200424
796.584	796.585	0.0021	PE 40:4	C45H82NO8P	[M+H]+	-1.38089	4.56055	0.0334597	0.00779004
800.66	800.661	0.002	HexCer 40:1;O3	C46H89NO9	[M+H]+	-0.749381	1.61646	0.207353	0.226106
806.569	806.569	0.0014	PC 38:6	C46H80NO8P	[M+H]+	-0.495928	61.0269	0.0548055	0.0439134
810.6	810.601	0.0027	PC 38:4	C46H84NO8P	[M+H]+	-1.48038	39.0752	0.0350917	0.0216724
810.682	810.682	0.0017	HexCer 42:2;O2	C48H91NO8	[M+H]+	-0.246706	2.30627	0.295839	0.188557
812.695	812.697	0.0034	HexCer 42:1;O2	C48H93NO8	[M+H]+	-2.95313	1.05542	0.135386	0.0766952
813.684	813.684	0.0014	SM 42:2;O2	C47H93N2O6P	[M+H]+	0.122898	2.7201	0.0619505	0.139392
814.631	814.632	0.002	PC 38:2	C46H88NO8P	[M+H]+	-1.22755	5.45213	0.00489631	0.00933199
816.647	816.648	0.0017	PC 38:1	C46H90NO8P	[M+H]+	-0.857163	8.94829	0.00803605	0.00754302
826.676	826.677	0.0017	HexCer 42:2;O3	C48H91NO9	[M+H]+	-0.846764	0.915032	0.117377	0.10812
828.692	828.692	0.0023	HexCer 42:1;O3	C48H93NO9	[M+H]+	-0.362016	1.9025	0.244045	0.24733
832.584	832.585	0.0021	PC 40:7	C48H82NO8P	[M+H]+	-1.32119	14.6027	0.013114	0.0101671
834.601	834.601	0.0017	PC 40:6	C48H84NO8P	[M+H]+	-0.239636	56.4031	0.0506531	0.045411
836.542	836.544	0.0026	PS 40:6	C46H78NO10P	[M+H]+	-1.91263	6.34537	1	0.427405

## Sheet: negative ion mode
Lipid annotations mouse cerebellum in positive ion mode
m/z-value		D	Name	Formula	Ion	ppm	Intensity	rel. intensity in lipid class
measured	matched							MSI	Fitzner et al. 28
255.233	255.233	0.002	FA 16:0	C16H32O2	[M-H]-	0	0.407316	0.170483	N/A
281.248	281.249	0.0021	FA 18:1	C18H34O2	[M-H]-	-0.355557	0.655671	0.274432	N/A
283.264	283.264	0.0023	FA 18:0	C18H36O2	[M-H]-	-1.05908	1.3262	0.555085	N/A
673.481	673.481	0.0044	PA 34:1	C37H71O8P	[M-H]-	0.148482	2.07729	0.159315	0.362027
699.497	699.497	0.005	PA 36:2	C39H73O8P	[M-H]-	0	3.51766	0.269781	0.0931851
701.511	701.513	0.0062	PA 36:1	C39H75O8P	[M-H]-	-1.71059	1.84738	0.141682	0.29596
744.555	744.555	0.0059	PE 36:1	C41H80NO8P	[M-H]-	0.134308	1.75812	0.21308	0.0332483
747.498	747.497	0.0055	PA 40:6	C43H73O8P	[M-H]-	1.3378	3.5193	0.269907	0.045411
766.539	766.539	0.0052	PE 38:4	C43H78NO8P	[M-H]-	-0.260913	1.11252	0.134836	0.0735202
786.529	786.529	0.0061	PS 36:2	C42H78NO10P	[M-H]-	-0.127141	3.66702	0.262961	0.109968
788.543	788.545	0.0077	PS 36:1	C42H80NO10P	[M-H]-	-2.15587	3.40578	0.244227	0.280895
790.539	790.539	0.0057	PE 40:6	C45H78NO8P	[M-H]-	-0.252992	5.38033	0.652084	0.200424
806.545	806.546	0.0068	SHexCer 36:1;O2	C42H81NO11S	[M-H]-	-0.991884	1.5886	0.0391967	N/A
822.537	822.541	0.0072	SHexCer 36:1;O3	C42H81NO12S	[M-H]-	-4.49826	1.03795	0.0256099	N/A
834.529	834.529	0.0061	PS 40:6	C46H78NO10P	[M-H]-	-0.119828	6.87233	0.492812	0.427405
835.535	835.534	0.0062	PI 34:1	C43H81O13P	[M-H]-	0.957471	7.66417	0.212756	0
857.519	857.519	0.0066	PI 36:4	C45H79O13P	[M-H]-	-0.116616	2.06709	0.057382	0.0787391
862.608	862.608	0.0079	SHexCer 40:1;O2	C46H89NO11S	[M-H]-	-0.46371	1.32023	0.032575	N/A
878.603	878.603	0.0073	SHexCer 40:1;O3	C46H89NO12S	[M-H]-	-0.341451	4.42317	0.109136	N/A
883.534	883.534	0.0067	PI 38:5	C47H81O13P	[M-H]-	-0.226364	3.92242	0.108886	0.0872324
885.55	885.55	0.0069	PI 38:4	C47H83O13P	[M-H]-	0.112924	22.3696	0.620976	0.664361
888.624	888.624	0.008	SHexCer 42:2;O2	C48H91NO11S	[M-H]-	0	26.4473	0.652553	N/A
904.621	904.619	0.0074	SHexCer 42:2;O3	C48H91NO12S	[M-H]-	2.32142	2.37921	0.0587038	N/A
906.636	906.635	0.0081	SHexCer 42:1;O3	C48H93NO12S	[M-H]-	1.54417	3.33254	0.082226	N/A

## Sheet: Fitzner et al.
Lipid species in mouse cerebellum from literature
Name	monoisotopic mol. mass	Intensity	rel. intensity in lipid class	m/z
Cer 32:1;2	509.481	0.52234	0.0104702	510.488
Cer 36:1;2	565.543	36.3517	0.728663	566.551
Cer 36:2;2	563.528	3.13558	0.0628521	564.535
Cer 38:1;2	593.575	5.15969	0.103425	594.582
Cer 38:1;3	609.57	0.579176	0.0116095	610.577
Cer 40:1;2	621.606	0.426686	0.00855283	622.613
Cer 42:1;2	649.637	0.380537	0.00762778	650.645
Cer 42:2;2	647.622	3.33254	0.0668001	648.629
Chol+H20	386.355	9517.04	1	369.352
CL 68:2	1405	2.62696	0.0184957	1406.01
CL 70:0	1437.07	24.7513	0.174267	1438.07
CL 70:4	1429	4.11814	0.0289946	1430.01
CL 72:2	1461.07	4.37645	0.0308133	1462.07
CL 72:4	1457.03	10.4825	0.0738041	1458.04
CL 72:5	1455.02	14.4953	0.102057	1456.03
CL 72:6	1453	7.11762	0.0501131	1454.01
CL 72:7	1450.99	6.84441	0.0481895	1452
CL 74:6	1481.03	2.13053	0.0150004	1482.04
CL 74:8	1477	10.6906	0.0752695	1478.01
CL 74:9	1474.99	7.53876	0.0530782	1476
CL 76:10	1501	8.54299	0.0601487	1502.01
CL 76:11	1498.99	6.66137	0.0469007	1500
CL 76:9	1503.02	17.6749	0.124444	1504.03
CL 78:12	1525	6.37864	0.0449101	1526.01
CL 78:13	1522.99	1.27674	0.00898915	1524
CL 78:2	1545.16	3.38425	0.0238275	1546.17
CL 80:15	1546.99	2.9398	0.0206983	1548
DAG 32:1	566.491	2.12385	0.00814303	567.498
DAG 34:1	594.522	44.3204	0.169928	577.519
DAG 36:1	622.554	36.6279	0.140434	605.55
DAG 36:2	620.538	19.2629	0.0738553	621.545
DAG 36:4	616.507	21.1493	0.0810883	599.503
DAG 38:1	650.585	5.80001	0.0222377	651.592
DAG 38:2	648.569	2.04245	0.0078309	649.577
DAG 38:4	644.538	86.1133	0.330165	627.535
DAG 38:5	642.522	14.6057	0.0559993	643.53
DAG 38:6	640.507	6.36258	0.0243946	641.514
DAG 40:1	678.616	5.43043	0.0208207	679.623
DAG 40:6	668.538	16.9801	0.065103	669.545
HexCer 30:2;2	641.487	1.49444	0.00127817	642.494
HexCer 36:1;2	727.596	19.2323	0.0164491	728.603
HexCer 36:1;3	743.591	19.4662	0.0166491	744.598
HexCer 38:1;2	755.627	5.14054	0.00439662	756.635
HexCer 38:1;3	771.622	21.3302	0.0182434	772.63
HexCer 40:0;2	785.674	5.26956	0.00450696	786.682
HexCer 40:0;3	801.669	30.246	0.0258689	802.677
HexCer 40:1;2	783.659	33.8113	0.0289183	784.666
HexCer 40:1;3	799.654	264.365	0.226106	800.661
HexCer 40:2;2	781.643	8.55674	0.00731843	782.65
HexCer 40:2;3	797.638	12.4968	0.0106883	798.645
HexCer 42:0;2	813.706	4.67347	0.00399714	814.713
HexCer 42:0;3	829.701	7.03623	0.00601796	830.708
HexCer 42:1;2	811.69	89.6723	0.0766952	812.697
HexCer 42:1;3	827.685	289.18	0.24733	828.692
HexCer 42:2;2	809.674	220.461	0.188557	810.682
HexCer 42:2;3	825.669	126.414	0.10812	826.677
HexCer 44:1;3	855.716	3.97774	0.00340209	856.724
HexCer 44:2;2	837.706	2.16689	0.00185331	838.713
HexCer 44:2;3	853.701	4.21385	0.00360403	854.708
LPA 18:1	436.259	0.208172	0.0625719	437.266
LPA 20:0	466.306	3.11875	0.937428	467.313
LPC 14:1	465.286	4.65489	0.0732303	466.293
LPC 16:0	495.332	28.8727	0.454222	496.34
LPC 18:0	523.364	18.8772	0.296973	524.371
LPC 18:1	521.348	8.93245	0.140524	522.355
LPC 22:6	567.332	2.22795	0.0350498	568.34
LPE 18:0	481.317	10.3584	0.171232	482.324
LPE 18:1	479.301	16.6955	0.275989	480.308
LPE 20:1	507.332	4.97621	0.0822603	508.34
LPE 20:2	505.317	0.211387	0.00349438	506.324
LPE 20:3	503.301	1.07105	0.0177052	504.308
LPE 20:4	501.285	6.01589	0.0994469	502.293
LPE 22:4	529.317	3.0684	0.0507228	530.324
LPE 22:6	525.285	18.0966	0.29915	526.293
LPE O- 18:1	465.322	3.11431	0.0514817	466.329
LPI 16:0	572.296	0.403082	0.0271782	573.303
LPI 18:0	600.327	13.6955	0.923432	601.335
LPI 20:4	620.296	0.732508	0.04939	621.303
LPS 18:0	525.307	5.9588	0.585891	526.314
LPS 18:1	523.291	1.92707	0.189477	524.298
LPS 22:6	569.275	2.28461	0.224632	570.283
PA 32:0	648.473	3.45158	0.012126	649.48
PA 34:0	676.504	14.6784	0.0515676	677.512
PA 34:1	674.489	103.049	0.362027	675.496
PA 36:1	702.52	84.2429	0.29596	703.527
PA 36:2	700.504	26.5245	0.0931851	701.512
PA 36:4	696.473	2.35599	0.00827699	697.48
PA 38:1	730.551	13.0965	0.0460102	731.558
PA 38:2	728.536	4.69427	0.0164918	729.543
PA 38:4	724.504	25.5198	0.0896555	725.512
PA 40:1	758.583	2.27219	0.00798259	759.59
PA 40:6	748.504	2.53451	0.00890416	749.512
PA 42:1	786.614	2.22394	0.00781308	787.621
PC 30:0	705.531	17.4415	0.00160435	706.538
PC 31:0	719.546	126.579	0.0116434	720.554
PC 32:0	733.562	1398.1	0.128604	734.569
PC 32:1	731.546	70.3018	0.00646672	732.554
PC 32:2	729.531	999.067	0.0918993	730.538
PC 33:0	747.578	7.68385	0.0007068	748.585
PC 33:1	745.562	161.258	0.0148334	746.569
PC 34:0	761.593	565.958	0.0520597	762.601
PC 34:1	759.578	3128.4	0.287767	760.585
PC 34:2	757.562	386.67	0.0355679	758.569
PC 34:3	755.546	16.187	0.00148896	756.554
PC 35:1	773.593	159.219	0.0146458	774.601
PC 36:0	789.625	11.6638	0.00107289	790.632
PC 36:1	787.609	1102.59	0.101422	788.616
PC 36:2	785.593	322.775	0.0296905	786.601
PC 36:3	783.578	83.6998	0.00769914	784.585
PC 36:4	781.562	232.323	0.0213703	782.569
PC 36:5	779.546	38.6169	0.00355218	780.554
PC 37:0	803.64	40.9518	0.00376696	804.648
PC 37:1	801.625	40.7527	0.00374864	802.632
PC 37:2	799.609	39.6999	0.0036518	800.616
PC 38:1	815.64	82.0026	0.00754302	816.648
PC 38:2	813.625	101.451	0.00933199	814.632
PC 38:3	811.609	47.3361	0.00435422	812.616
PC 38:4	809.593	235.608	0.0216724	810.601
PC 38:5	807.578	76.4182	0.00702934	808.585
PC 38:6	805.562	477.397	0.0439134	806.569
PC 38:7	803.546	6.55418	0.000602887	804.554
PC 39:4	823.609	3.79361	0.000348956	824.616
PC 39:6	819.578	14.6178	0.00134462	820.585
PC 40:1	843.672	23.1658	0.00213091	844.679
PC 40:2	841.656	16.7653	0.00154216	842.663
PC 40:4	837.625	23.414	0.00215374	838.632
PC 40:5	835.609	6.42722	0.000591209	836.616
PC 40:6	833.593	493.677	0.045411	834.601
PC 40:7	831.578	110.53	0.0101671	832.585
PC 42:1	871.703	17.4871	0.00160856	872.71
PC 42:2	869.687	9.04777	0.000832261	870.695
PC O 32:0	719.583	6.02472	0.000554185	720.59
PC O 34:1	745.599	25.9197	0.00238423	746.606
PC O 34:3	741.567	21.9325	0.00201747	742.574
PC O 36:1	773.63	3.48497	0.000320566	774.637
PC O 37:1	787.645	19.1477	0.00176131	788.653
PC O 37:2	785.63	91.8651	0.00845022	786.637
PC O 40:5	821.63	7.31113	0.000672516	822.637
PE 32:0	691.515	5.1602	0.000731949	692.522
PE 34:1	717.531	152.148	0.0215815	718.538
PE 34:2	715.515	11.0682	0.00156998	716.522
PE 36:1	743.546	234.399	0.0332483	744.554
PE 36:3	741.531	15.9812	0.00226685	742.538
PE 36:4	739.515	63.2651	0.00897385	740.522
PE 38:2	771.578	37.235	0.0052816	772.585
PE 38:3	769.562	13.2847	0.00188437	770.569
PE 38:4	767.546	518.314	0.0735202	768.554
PE 38:5	765.531	163.549	0.0231986	766.538
PE 38:6	763.515	333.186	0.0472608	764.522
PE 39:6	777.531	7.63854	0.00108349	778.538
PE 40:4	795.578	54.9194	0.00779004	796.585
PE 40:5	793.562	9.99197	0.00141731	794.569
PE 40:6	791.546	1412.98	0.200424	792.554
PE 40:7	789.531	131.147	0.0186026	790.538
PE 40:8	787.515	4.67154	0.000662635	788.522
PE 42:8	815.546	1.18254	0.000167738	816.554
PE 44:10	839.546	9.20395	0.00130554	840.554
PE 44:12	835.515	32.61	0.00462557	836.522
PE O 32:1	675.52	4.29671	0.000609467	676.528
PE O 32:2	673.505	5.35931	0.000760192	674.512
PE O 34:1	703.552	30.6924	0.00435357	704.559
PE O 34:2	701.536	318.884	0.0452321	702.543
PE O 34:3	699.52	13.41	0.00190214	700.528
PE O 35:2	715.552	14.4502	0.00204969	716.559
PE O 35:3	713.536	1.03042	0.000146159	714.543
PE O 36:1	731.583	14.094	0.00199916	732.59
PE O 36:2	729.567	519.777	0.0737278	730.574
PE O 36:3	727.552	517.05	0.073341	728.559
PE O 36:4	725.536	37.2988	0.00529066	726.543
PE O 36:5	723.52	57.397	0.00814148	724.528
PE O 37:2	743.583	8.52098	0.00120866	744.59
PE O 37:5	737.536	4.38335	0.000621757	738.543
PE O 38:1	759.614	14.0013	0.00198601	760.621
PE O 38:2	757.598	175.067	0.0248324	758.606
PE O 38:3	755.583	214.948	0.0304893	756.59
PE O 38:4	753.567	49.7493	0.0070567	754.574
PE O 38:5	751.552	263.806	0.0374196	752.559
PE O 38:6	749.536	147.324	0.0208971	750.543
PE O 38:7	747.52	227.037	0.0322041	748.528
PE O 39:2	771.614	2.30197	0.000326523	772.621
PE O 39:3	769.598	1.76541	0.000250414	770.606
PE O 39:5	765.567	2.59482	0.000368063	766.574
PE O 39:7	761.536	3.63454	0.000515542	762.543
PE O 40:3	783.614	28.7694	0.0040808	784.621
PE O 40:4	781.598	13.8316	0.00196194	782.606
PE O 40:5	779.583	118.419	0.0167972	780.59
PE O 40:6	777.567	139.514	0.0197893	778.574
PE O 40:7	775.552	772.922	0.109635	776.559
PE O 40:8	773.536	98.8691	0.0140241	774.543
PE O 41:2	799.645	2.43683	0.000345652	800.653
PE O 42:2	813.661	1.78581	0.000253308	814.668
PE O 42:3	811.645	2.52442	0.000358076	812.653
PE O 42:5	807.614	5.14115	0.000729248	808.621
PE O 42:6	805.598	4.92707	0.000698881	806.606
PG 32:0	722.51	3.27027	0.0701442	723.517
PG 34:1	748.525	22.2741	0.477758	749.533
PG 34:2	746.51	0.363545	0.00779769	747.517
PG 36:0	778.572	0.955262	0.0204894	779.58
PG 36:2	774.541	3.54015	0.0759329	775.548
PG 36:3	772.525	0.210822	0.00452193	773.533
PG 36:4	770.51	1.76521	0.0378621	771.517
PG 38:4	798.541	3.8304	0.0821585	799.548
PG 38:5	796.525	1.0301	0.0220947	797.533
PG 44:12	866.51	9.38225	0.20124	867.517
PI 34:0	838.557	1.75551	0.00199365	839.564
PI 36:1	864.573	14.0575	0.0159645	865.58
PI 36:2	862.557	6.27255	0.00712343	863.564
PI 36:3	860.541	0.604431	0.000686423	861.549
PI 36:4	858.526	69.3339	0.0787391	859.533
PI 38:4	886.557	585.004	0.664361	887.564
PI 38:5	884.541	76.8126	0.0872324	885.549
PI 38:6	882.526	13.9279	0.0158172	883.533
PI 40:4	914.588	70.0184	0.0795165	915.596
PI 40:5	912.573	8.05189	0.00914414	913.58
PI 40:6	910.557	34.713	0.0394219	911.564
PS 34:0	763.536	20.5573	0.00504468	764.544
PS 34:1	761.521	67.2696	0.0165077	762.528
PS 36:1	789.552	1144.66	0.280895	790.559
PS 36:2	787.536	448.127	0.109968	788.544
PS 36:3	785.521	6.77827	0.00166336	786.528
PS 38:1	817.583	122.997	0.030183	818.591
PS 38:2	815.568	42.5208	0.0104344	816.575
PS 38:3	813.552	143.573	0.0352323	814.559
PS 38:4	811.536	56.7131	0.0139171	812.544
PS 38:5	809.521	27.4994	0.00674823	810.528
PS 39:1	831.599	3.30164	0.000810208	832.606
PS 40:1	845.615	31.7097	0.00778143	846.622
PS 40:2	843.599	22.9488	0.00563154	844.606
PS 40:4	839.568	67.5027	0.0165649	840.575
PS 40:6	835.536	1741.7	0.427405	836.544
PS 40:7	833.521	31.6468	0.00776599	834.528
PS 41:1	859.63	4.42557	0.00108602	860.637
PS 42:1	873.646	16.1548	0.00396431	874.653
PS 42:2	871.63	14.6621	0.00359801	872.637
PS 44:10	883.536	2.61148	0.000640846	884.544
PS 44:12	879.505	57.6948	0.0141581	880.512
SM 34:1;2	702.568	19.1814	0.0317246	703.575
SM 36:1;2	730.599	417.779	0.690976	731.606
SM 36:2;2	728.583	7.65788	0.0126656	729.59
SM 38:1;2	758.63	35.9489	0.0594569	759.637
SM 40:1;2	786.661	18.5726	0.0307178	787.669
SM 40:2;2	784.646	3.14112	0.00519518	785.653
SM 42:1;2	814.693	18.0612	0.0298719	815.7
SM 42:2;2	812.677	84.2793	0.139392	813.684
TAG 44:0	750.674	2.04739	0.0916716	751.681
TAG 46:1	776.689	2.31222	0.103529	777.697
TAG 48:2	802.705	1.74882	0.0783032	803.712
TAG 49:1	818.736	1.35088	0.0604855	819.744
TAG 50:1	832.752	3.36084	0.150481	833.759
TAG 50:2	830.736	2.07835	0.0930578	831.744
TAG 52:1	860.783	2.09967	0.0940124	861.791
TAG 52:2	858.768	2.45646	0.109988	859.775
TAG 54:1	888.815	1.53438	0.0687017	889.822
TAG 54:2	886.799	2.25805	0.101104	887.806
TAG 54:3	884.783	1.0869	0.0486658	885.791
adapted from:
Fitzner, D., Bader, J.M., Penkert, H., Bergner, C.G., Su, M., Weil, M.-T., Surma, M.A., Mann, M., Klose, C., and Simons, M. (2020). Cell-Type- and Brain-Region-Resolved Mouse Brain Lipidome. Cell Rep. 32, 108132. https://doi.org/10.1016/j.celrep.2020.108132.
