# Supplementary material for: Spatial biology using single-cell mass spectrometry imaging and integrated microscopy
Source: Research Square preprint supplement (doi:10.21203/rs.3.rs-6751055/v1), 2025-06-25
Supplement: Supplementary file 3 [file a5b39d5f7a7e4cbd6f79c3bf.xlsx]

## Sheet: mouse tumor positive ion mode
Table S2
Lipid annotations 4T1-tumor in positive ion mode
m/z-value		D	Name	Formula	Ion	ppm	Intensity
measured	matched
369.352	369.352	0.0004	Cholesterol	C27H45	[M+H-H2O]+	1.08298	72.2925
428.374	428.373	0.0006	ACAR 18:0	C25H50NO4	[M+H]+	1.40065	6.16962
496.34	496.34	0.0002	LPC 16:0	C24H50NO7P	[M+H]+	0.40295	20.1717
522.356	522.355	0.0006	LPC 18:1	C26H52NO7P	[M+H]+	1.14864	9.85119
524.371	524.371	0.0004	LPC 18:0	C26H54NO7P	[M+H]+	0.762819	10.9899
549.488	549.488	0.0003	DG 32:1	C35H66O5	[M+H-H2O]+	0.545963	7.81855
551.504	551.503	0.0002	DG 32:0	C35H68O5	[M+H-H2O]+	0.362645	14.6071
575.503	575.503	0.0004	DG 34:2	C37H68O5	[M+H-H2O]+	0.695044	12.5169
577.519	577.519	0	DG 34:1	C37H70O5	[M+H-H2O]+	0	20.0279
597.487	597.488	0.0007	DG 36:5	C39H66O5	[M+H-H2O]+	1.17157	2.17336
599.503	599.503	0.0004	DG 36:4	C39H68O5	[M+H-H2O]+	0.667219	6.17403
601.519	601.519	0.0005	DG 36:3	C39H70O5	[M+H-H2O]+	0.831229	8.77376
603.534	603.535	0.0003	DG 36:2	C39H72O5	[M+H-H2O]+	0.497072	13.4828
605.55	605.55	0.0003	DG 36:1	C39H74O5	[M+H-H2O]+	0.495417	7.04547
625.518	625.519	0.0006	DG 38:5	C41H70O5	[M+H-H2O]+	0.959203	2.92937
627.534	627.535	0.0004	DG 38:4	C41H72O5	[M+H-H2O]+	0.637415	5.85226
703.575	703.575	0.0002	SM 34:1;O2	C39H79N2O6P	[M+H]+	0.284263	62.8252
704.523	704.523	0	PC 30:1	C38H74NO8P	[M+H]+	0	5.18208
706.538	706.538	0.0001	PC 30:0	C38H76NO8P	[M+H]+	0.141535	36.0074
718.574	718.574	0	PC O-32:1	C40H80NO7P	[M+H]+	0	8.27673
720.553	720.554	0.0003	PE 34:0	C39H78NO8P	[M+H]+	0.416346	8.65928
720.59	720.59	0.0002	PC O-32:0	C40H82NO7P	[M+H]+	0.27755	16.1478
730.538	730.538	0.0001	PC 32:2	C40H76NO8P	[M+H]+	0.136885	10.5505
731.606	731.606	0.0001	SM 36:1;O2	C41H83N2O6P	[M+H]+	0.136686	4.11628
732.554	732.554	0.0002	PC 32:1	C40H78NO8P	[M+H]+	0.273017	78.1531
734.569	734.569	0.0004	PC 32:0	C40H80NO8P	[M+H]+	0.544537	160.317
744.553	744.554	0.0003	PE 36:2	C41H78NO8P	[M+H]+	0.402926	4.13425
744.59	744.59	0.0002	PC O-34:2	C42H82NO7P	[M+H]+	0.268604	11.7221
746.569	746.569	0.0001	PE 36:1	C41H80NO8P	[M+H]+	0.133946	9.33135
746.606	746.606	0.0002	PC O-34:1	C42H84NO7P	[M+H]+	0.267879	34.9098
748.585	748.585	0.0006	PE 36:0	C41H82NO8P	[M+H]+	0.801512	8.61055
754.538	754.538	0.0006	PC 34:4	C42H76NO8P	[M+H]+	0.795188	4.03228
756.553	756.554	0.0008	PC 34:3	C42H78NO8P	[M+H]+	1.05743	18.4591
758.569	758.569	0.0004	PC 34:2	C42H80NO8P	[M+H]+	0.527308	133.665
760.585	760.585	0.0001	PC 34:1	C42H82NO8P	[M+H]+	0.131478	250.313
768.589	768.59	0.0009	PC O-36:4	C44H82NO7P	[M+H]+	1.17098	18.0333
770.605	770.606	0.0013	PC O-36:3	C44H84NO7P	[M+H]+	1.68698	8.43866
772.584	772.585	0.0007	PE 38:2	C43H82NO8P	[M+H]+	0.906049	7.69506
772.62	772.621	0.001	PC O-36:2	C44H86NO7P	[M+H]+	1.29429	7.03745
774.6	774.601	0.0007	PE 38:1	C43H84NO8P	[M+H]+	0.903691	10.8024
780.552	780.554	0.0018	PC 36:5	C44H78NO8P	[M+H]+	2.30606	9.92442
782.568	782.569	0.0014	PC 36:4	C44H80NO8P	[M+H]+	1.78898	72.3427
784.584	784.585	0.0011	PC 36:3	C44H82NO8P	[M+H]+	1.40201	67.0019
786.6	786.601	0.0007	PC 36:2	C44H84NO8P	[M+H]+	0.889905	165.845
788.615	788.616	0.0014	PC 36:1	C44H86NO8P	[M+H]+	1.77526	88.5514
790.559	790.559	0.0003	PS 36:1	C42H80NO10P	[M+H]+	0.379478	4.66806
794.605	794.606	0.0012	PC O-38:5	C46H84NO7P	[M+H]+	1.51018	17.1342
796.62	796.621	0.0015	PC O-38:4	C46H86NO7P	[M+H]+	1.88295	10.8367
798.635	798.637	0.0021	PC O-38:3	C46H88NO7P	[M+H]+	2.62948	4.02624
800.615	800.616	0.0014	PE 40:2	C45H86NO8P	[M+H]+	1.74865	5.43853
806.568	806.569	0.0014	PC 38:6	C46H80NO8P	[M+H]+	1.73575	12.241
808.584	808.585	0.0011	PC 38:5	C46H82NO8P	[M+H]+	1.3604	29.3996
810.6	810.601	0.0007	PC 38:4	C46H84NO8P	[M+H]+	0.863557	70.4866
812.614	812.616	0.0024	PC 38:3	C46H86NO8P	[M+H]+	2.95342	25.8559
813.683	813.684	0.0009	SM 42:2;O2	C47H93N2O6P	[M+H]+	1.10608	23.1509
814.63	814.632	0.0015	PC 38:2	C46H88NO8P	[M+H]+	1.84132	13.5747
816.645	816.648	0.0022	PC 38:1	C46H90NO8P	[M+H]+	2.69394	5.02572
827.711	827.712	0.0013	TG 50:4	C53H94O6	[M+H]+	1.57059	2.73105
829.727	829.728	0.001	TG 50:3	C53H96O6	[M+H]+	1.20521	4.03053
834.599	834.601	0.0017	PC 40:6	C48H84NO8P	[M+H]+	2.0369	7.69812
855.742	855.744	0.0011	TG 52:4	C55H98O6	[M+H]+	1.28543	6.73551
879.742	879.744	0.0016	TG 54:6	C57H98O6	[M+H]+	1.81871	2.77408
881.758	881.759	0.0017	TG 54:5	C57H100O6	[M+H]+	1.92796	3.9352
